# Supplementary material for: Fe3O4/SiO2/C nanocomposite as a high-performance Fenton-like catalyst in a neutral environment
Source: Royal Society of Chemistry journal article supplement (doi:10.1039/c5ra22890e), 2016-01-01
Supplement: c5ra22890e1.pdf [file c5ra22890e1.pdf]

### Electronic supplementary information

**Experimental procedure.** FSCNC (20 mg) was incubated with MB (20 mL, pH 7.5, 50 mg/L) for 1 h before the test. Then, H<sub>2</sub>O<sub>2</sub> was added for the catalysis group. Without adding H<sub>2</sub>O<sub>2</sub>, the sample was regarded as the adsorption group. At time intervals of 5 min, the absorbance of MB solution was recorded for catalysis group. For adsorption group, the time intervals were 10 min.

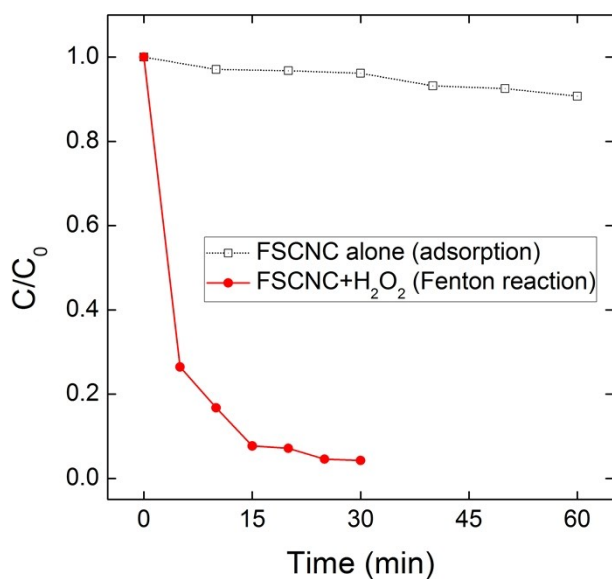

**Fig. S1.** Catalysis vs adsorption during the decoloration of MB.

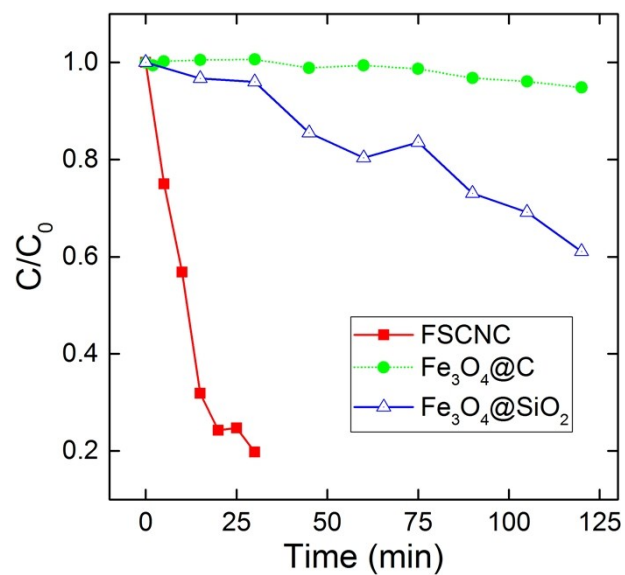

**Fig. S2.** Tolerance of FSCNC-H<sub>2</sub>O<sub>2</sub>, Fe<sub>3</sub>O<sub>4</sub>@C-H<sub>2</sub>O<sub>2</sub> and Fe<sub>3</sub>O<sub>4</sub>@SiO<sub>2</sub>-H<sub>2</sub>O<sub>2</sub> systems against tertiary butanol. For FSCNC-H<sub>2</sub>O<sub>2</sub> and Fe<sub>3</sub>O<sub>4</sub>@SiO<sub>2</sub>-H<sub>2</sub>O<sub>2</sub>, the tertiary butanol concentration was 1.05 mol/L; for Fe<sub>3</sub>O<sub>4</sub>@C-H<sub>2</sub>O<sub>2</sub>, the tertiary butanol concentration was 0.052 mol/L.
